# Supplementary material for: Manifestaciones sonoras modernas: la música electrónica y experimental en Barcelona. Modernidad y postmodernidad en la música contemporánea
Source: Springer Nature journal article supplement (doi:10.1186/1471-2105-8-273), 1997-01-01
Supplement: 12859_2006_1645_MOESM2_ESM.pdf [file 12859_2006_1645_MOESM2_ESM.pdf]

| <b>Pearson</b> | <b>PP</b> | <b>AA</b> | <b>PA</b> | <b>AA-RMA</b> |
|----------------|-----------|-----------|-----------|---------------|
| <b>MAS 5</b>   | 0.92      | 0.72      | 0.93      | 0.85          |
| <b>RMA</b>     | 0.93      | 0.79      | 0.91      | 0.86          |
| <b>CCC</b>     | <b>PP</b> | <b>AA</b> | <b>PA</b> | <b>AA-RMA</b> |
| <b>MAS 5</b>   | 0.92      | 0.67      | 0.93      | 0.67          |
| <b>RMA</b>     | 0.93      | 0.47      | 0.32      | 0.25          |
